# Supplementary material for: Investigating the response of land–atmosphere interactions and feedbacks to spatial representation of irrigation in a coupled modeling framework
Source: Copernicus journal article supplement (doi:10.5194/hess-27-2787-2023), 2023-07-26
Supplement: Supplementary file 1 [file hess-27-2787-2023-supplement.pdf]

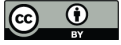

*Supplement of*

## **Investigating the response of land–atmosphere interactions and feedbacks to spatial representation of irrigation in a coupled modeling framework**

**Patricia Lawston-Parker et al.**

*Correspondence to:* Patricia Lawston-Parker ([patricia.m.parker@nasa.gov](mailto:patricia.m.parker@nasa.gov))

The copyright of individual parts of the supplement might differ from the article licence.

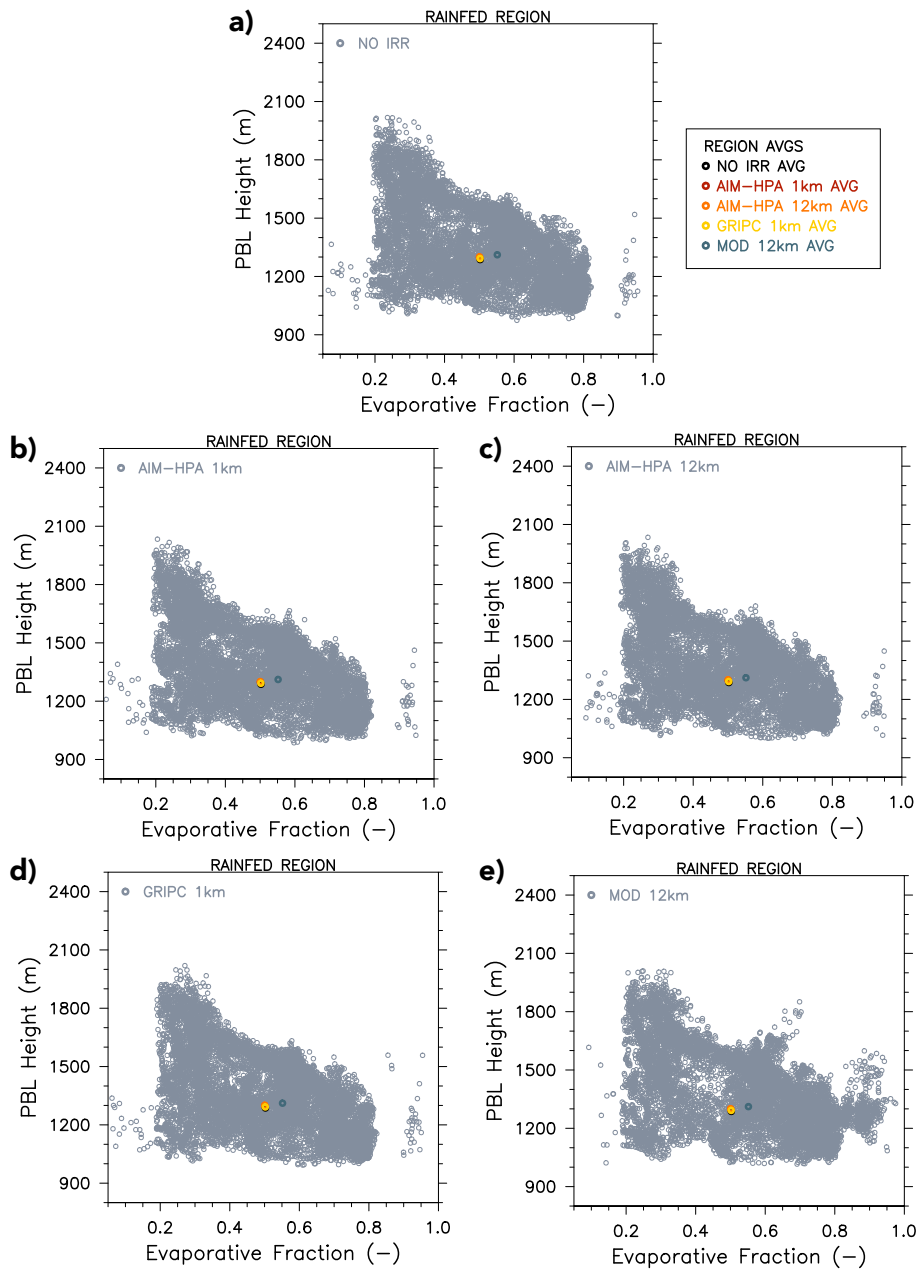

Supplemental Figure 1. Evaporative Fraction vs. PBL Height plots for the Rainfed subregion for the a) NO IRR, b) AIM-HPA 1km, c) AIM-HPA 12km, d) GRIPC 1km, e) MOD 12 km runs. There is one gray marker for each 1km gridcell within the 100 x 100km irrigated subregion. The colored markers represent the subregional average in each run and therefore are the same for each subplot.

5

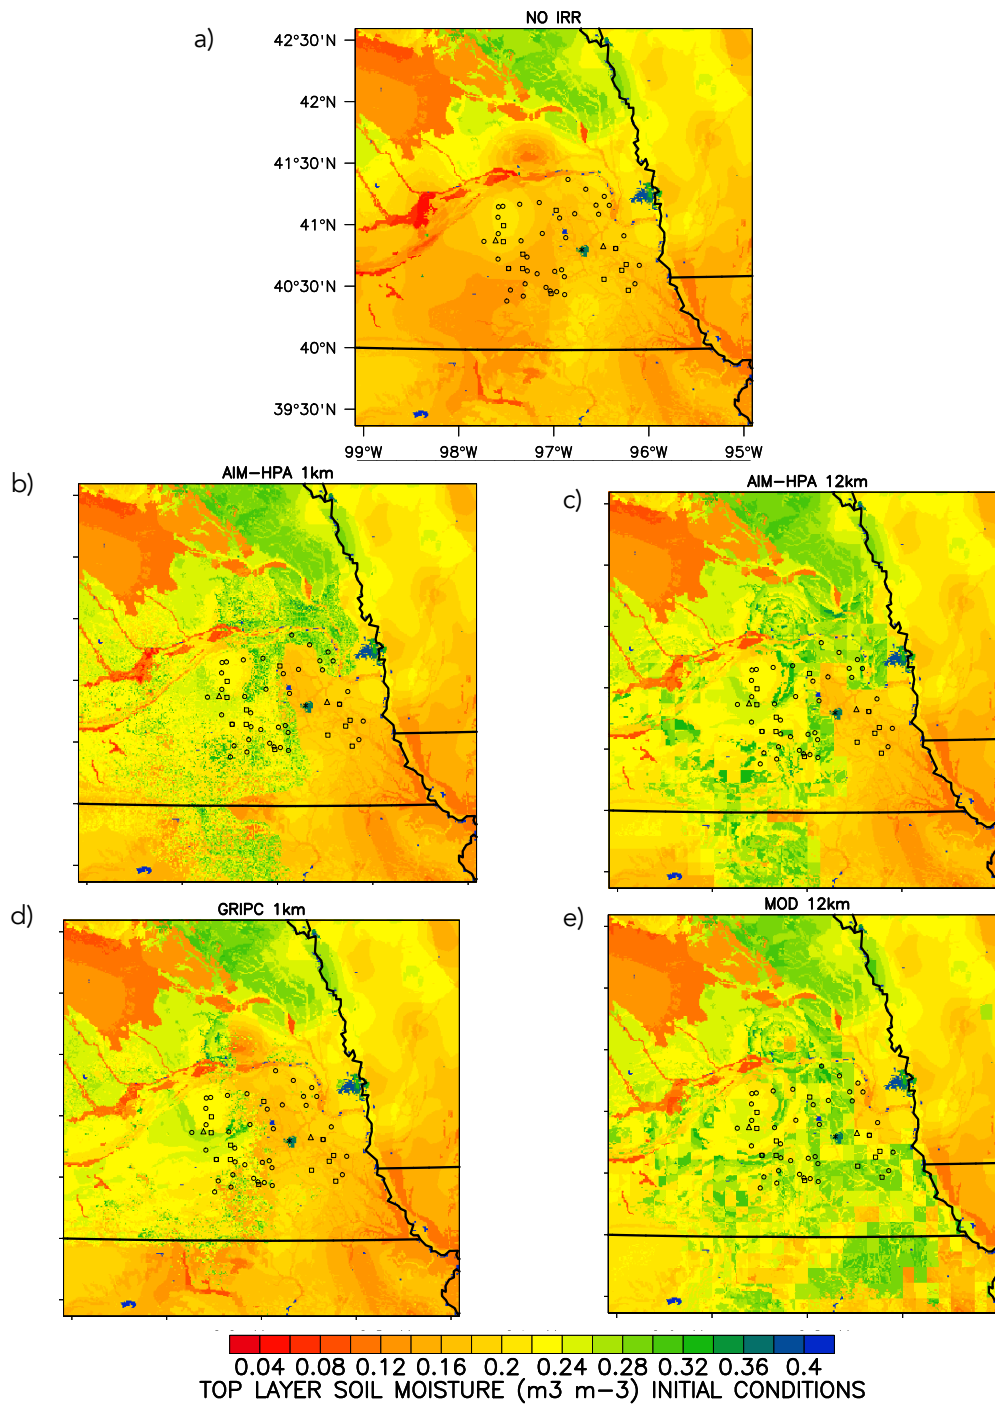

Supplemental Figure 2. Initial top layer soil moisture in the a) NO IRR, b) AIM-HPA 1km, c) AIM-HPA 12km, d) GRIPC 1 km, and e) MOD 12km runs.

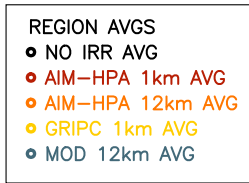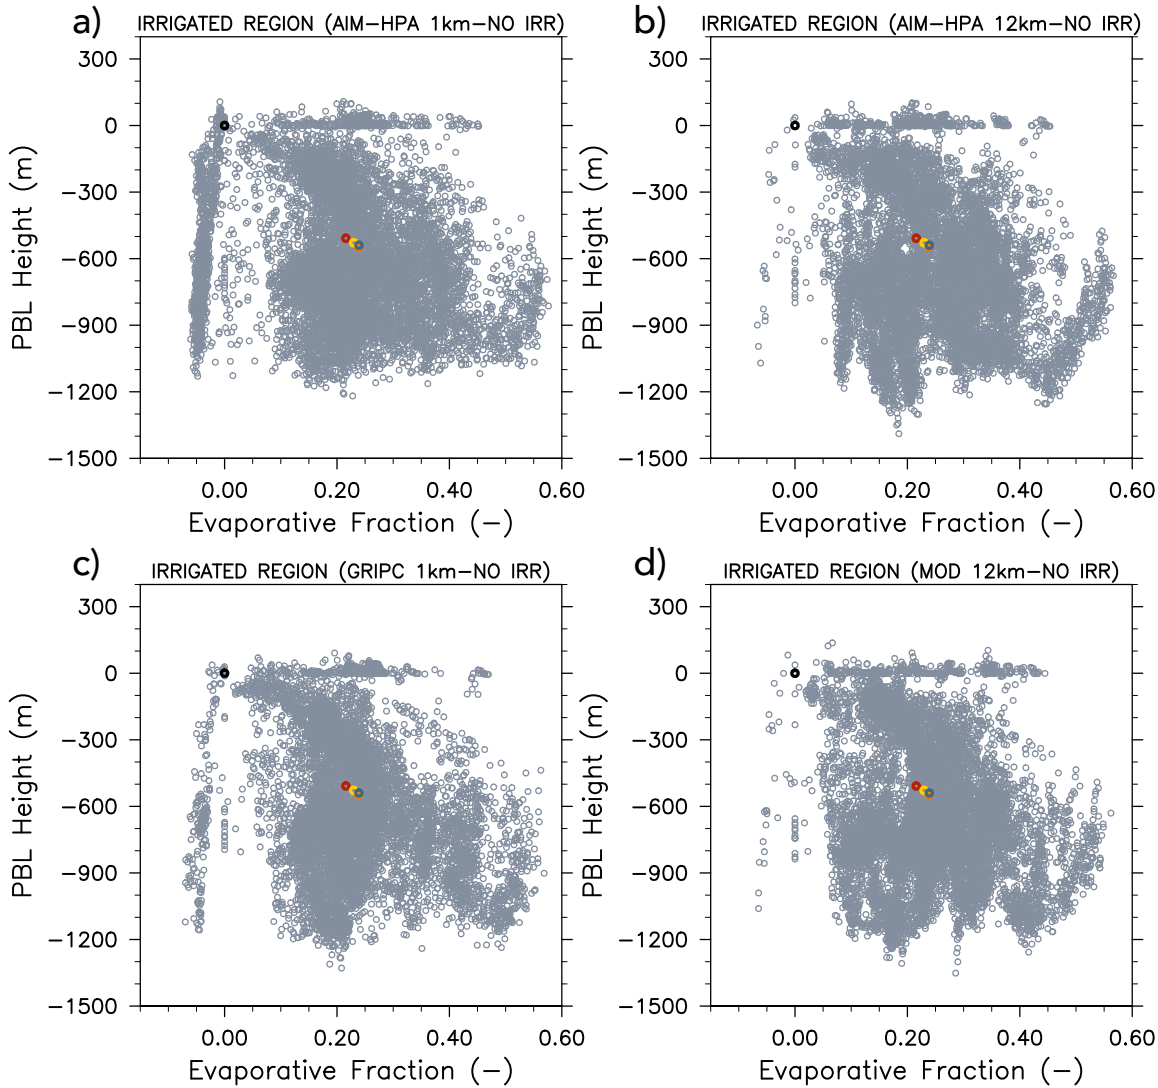

10

**Supplemental Figure 3. Difference in Evaporative Fraction vs. Difference in PBL Height plots for the Irrigated subregion for the a) NO IRR, b) AIM-HPA 1km, c) AIM-HPA 12km, d) GRIPC 1km, e) MOD 12 km runs. There is one gray marker for each 1km gridcell within the 100 x 100km irrigated subregion. The colored markers represent the subregional average in each run and therefore are the same for each subplot.**

15



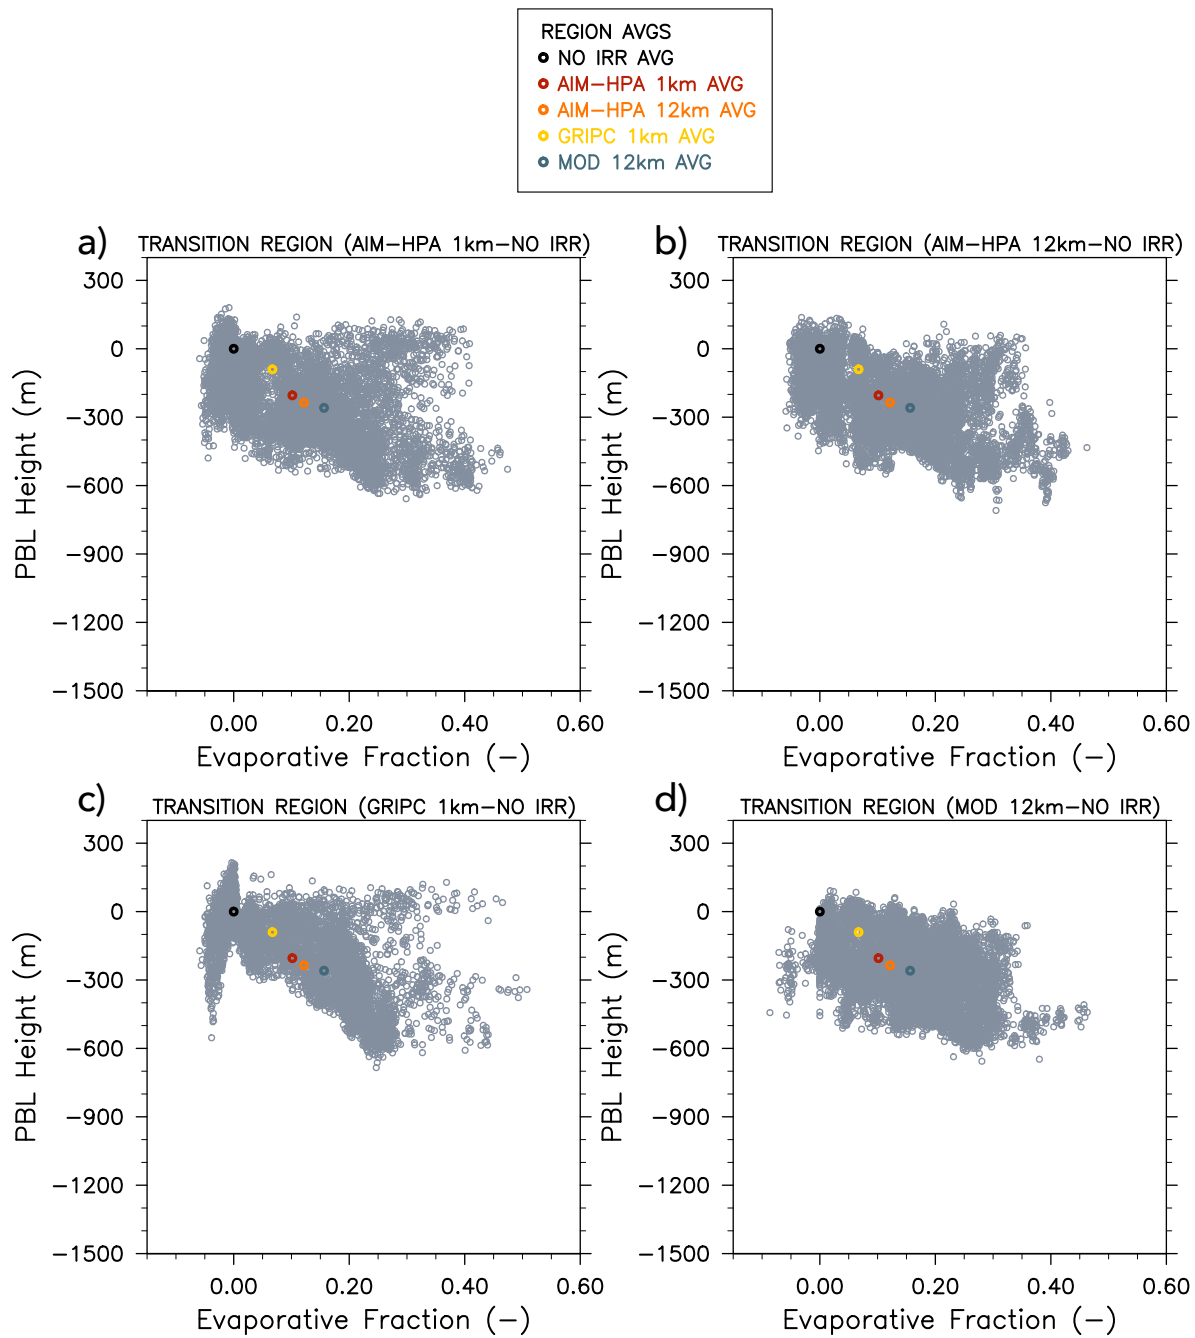

**Supplemental Figure 4.** As in Figure 3, but for the Transition region.

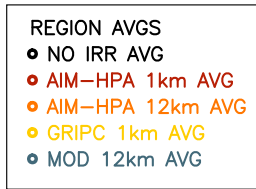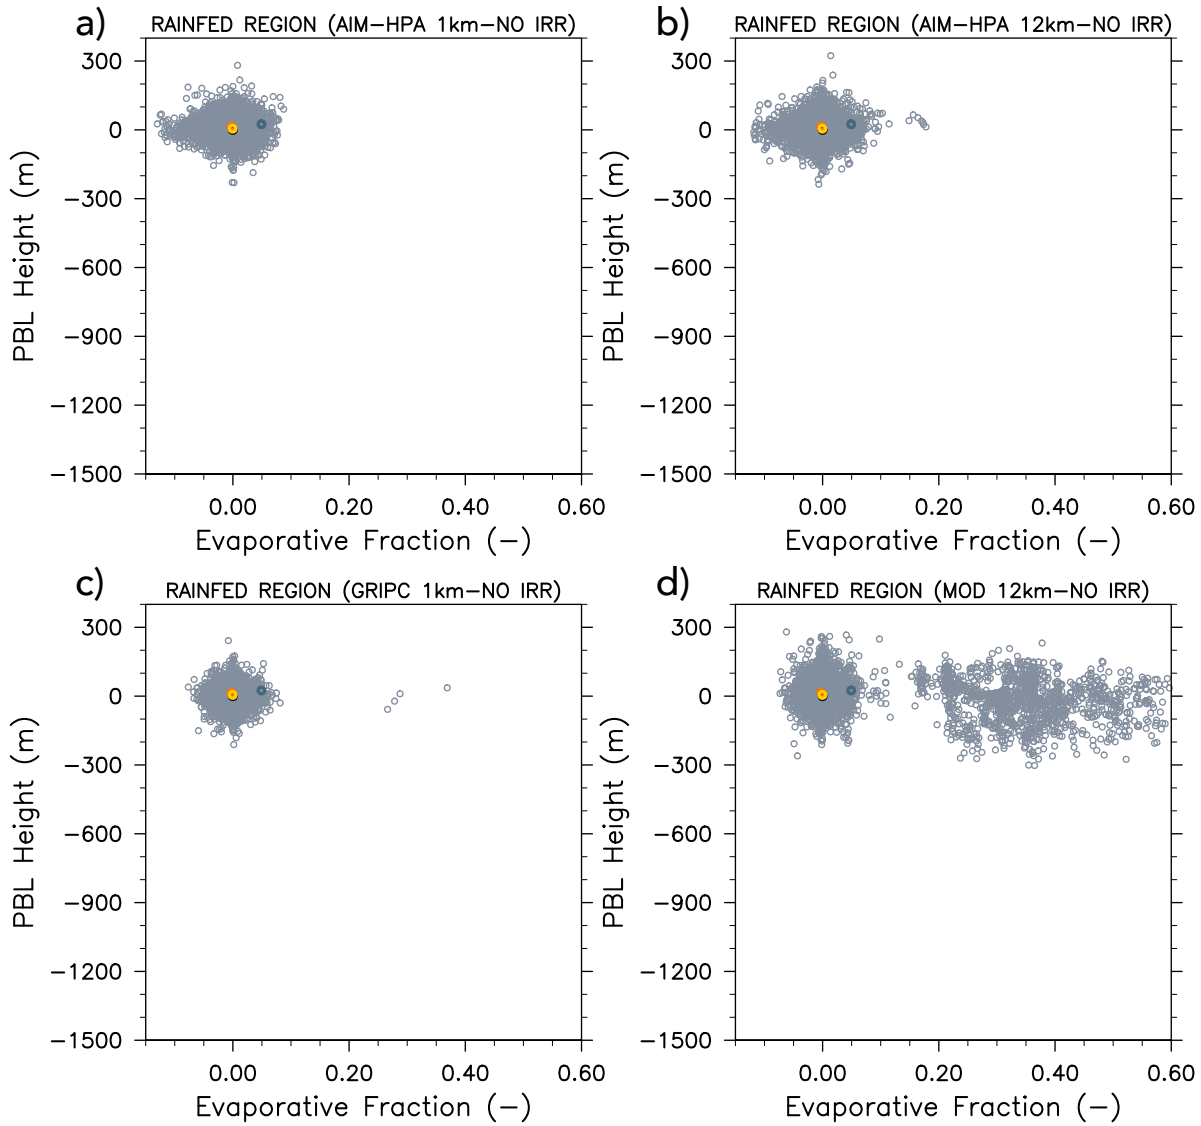

20 **Supplemental Figure 5.** As in Figure 3, but for the Rainfed region.
